# Supplementary material for: Co-Design Process of a Virtual Community of Practice for the Empowerment of People with Ischemic Heart Disease
Source: PubMed Central journal article supplement (PMC7664302; doi:10.5334/ijic.5514), 2020-11-09
Supplement: ijic-20-4-5514-s1.pdf [file ijic-20-4-5514-s1.pdf]

### Additional file 1. GRIPP2 short form checklist

| Section and topic                     | Item                                                                                                                                      | Section in which reported    |
|---------------------------------------|-------------------------------------------------------------------------------------------------------------------------------------------|------------------------------|
| 1: Aim                                | Report the aim of PPI in the study                                                                                                        | Introduction and methodology |
| 2: Methods                            | Provide a clear description of the methods used for PPI in the study                                                                      | Methodology                  |
| 3: Study results                      | Outcomes – report the results of PPI in the study, including both positive and negative outcomes                                          | Results                      |
| 4: Discussions and conclusions        | Outcomes: Comment on the extent to which PPI influenced the study overall. Describe positive and negative effects                         | Discussion and conclusions   |
| 5: Reflections / critical perspective | Comment critically on the study, reflecting on the things that went well and those that did not, so others can learn from this experience | Discussion                   |

PPI = Patients and Public Involvement
